# Supplementary material
Source: Springer Nature journal article supplement (https://www.springermedizin.de/resource/supplementary/12955_2012_1044_MOESM1_ESM.docx/9558628)
Supplement: MOESM1 [file 9558628]

**Supplementary Tables and References for the 100 Full-Text Articles Reviewed for the Manuscript Entitled, “Systematic Review of Health-Related Quality of Life Models.”**

Supplementary Table A: Subset of 25 Articles using a Uniquely Derived Model …………………. Pages 2-8

Supplementary Table B: Subset of 52 Articles Guided by Existing Models Used Once or Twice …. Pages 9-21

References for the 100 Full-Text Articles Reviewed …………………………………………………Pages 22-32

**Supplementary Table A: Subset of 25 Articles Using a Uniquely Derived Model (Disease-specific n = 24; Consensus n = 1).**

| **Authors**  **(year)**  **Country** | **Purpose** | **Design** | **Sample** | **Model guided or derived** | **Models derived** |
| --- | --- | --- | --- | --- | --- |
| Bandell-Hoekstra, Abu-Saad, Passchier, & Knipschild (2000)  Netherlands | To review the literature on personal and situational variables, coping strategies, and QOL among children with recurrent headaches. | Literature review | NA | Derived | Authors derived a conceptual model linking primary headache, coping, and QOL in children |
| Barr & Schumacher (2003)  United States | To identify items for inclusion in a Nutrition Quality of Life survey based on focus groups, surveys, and a consensus process. | Descriptive | 65 patients receiving medical nutrition therapy and 46 dietitians | Derived | Researchers identified six categories of HRQOL inductively and deductively |
| Brod, Perwien, Adler, Spencer, & Johnston (2005)  United States | To determine how symptoms and associated functional impairments impact QOL in adults with attention deficit hyperactivity disorder. | Descriptive | 29 patients with attention deficit hyperactivity disorder and 4 experts | Derived | Authors derived a model of QOL in attention deficit hyperactivity disorder |
| Chan & Yeung (2008)  China | To construct and test, using path analysis techniques, a pertinent conceptual model of QOL among people with schizophrenia living in the community. | Descriptive | 200 people with schizophrenia | Derived | Conceptual model of QOL among people with schizophrenia living in the community |
| Chin, Polonsky, Thomas, & Nerney (2000)  United States | To better understand how older African Americans with diabetes view their illness and to develop a conceptual framework for approaching their care. | Qualitative | 19 patients from an urban academic medical center. | Derived | Conceptual framework for understanding illness and attitudes in older, urban African Americans with diabetes |
| Edwards, Huebner, Connell, & Patrick (2002)  United States | To develop a conceptual model for assessing generic QOL among youth with physical and developmental disabilities | Qualitative | 33 adolescents with disabilities | Derived | Youth quality of life model with 4 domains - sense of self, social relationships, environment, general quality of life |
| Julkunena, Gustavsson-Liliusa, & Hietanenc, (2009)  Finland | To examine associations of anger-expression styles of both cancer patients and their partners with patient-perceived partner support and the impact of these variables on long-term HRQOL | Correlational | 153 cancer patients and their partners | Derived | Used path analysis to test a model of anger-expression styles on perceived partner support and HRQOL in cancer patients |
| Keller (2004)  Canada | To determine the independent association of nutritional risk and HRQOL in frail older adults | Descriptive | 367 frail older adults | Derived | Not named - derived regression model of factors associated with HRQOL in frail older adults |
| Kelley-Gillespie (2008)  United States | To assemble a comprehensive, integrated model of QOL for older adults with synthesis of the 6 major QOL domains (social, physical, psychological, cognitive, spiritual, environmental) | Literature review | NA | Derived | Integrated Conceptual Model of Quality of Life |
| King, Hinds, Dow, Schum, & Lee (2002)  United States | To explore patients’ QOL as defined by RNs in adult and pediatric oncology settings; Examine knowledge needed to apply QOL research outcomes in clinical practice; Develop model of nurses' perceptions of patients’ QOL | Qualitative | 24 oncology nurses | Derived | Nurses’ Relationship-Based Perception of Patients’ Quality of Life |
| Klassen, Pusic, Scott, Klok, & Cano (2009)  Canada | To describe how breast conditions and breast surgery impact patient satisfaction and quality of life in women who undergo breast surgery | Descriptive | 48 breast surgery patients | Derived | Conceptual model of patient satisfaction and QOL in breast surgery patients |
| López, Eng, Randall-David, & Robinson (2005)  United States | To explore how rural minority breast cancer survivors perceive and address QOL within their own social network and develop a conceptual framework. | Qualitative | 13 breast cancer survivors | Derived | Conceptual Framework of Rural African American Breast Cancer Survivorship QOL |
| Maurice-Stam, Oort, Last, & Grootenhuis (2009)  Netherlands | To examine factors that affect child cancer survivors’ HRQOL using a model in which demographic and medical characteristics explain HRQOL mediated by life course, coping, and social support | Descriptive | 353 survivors of childhood cancer | Derived | Conceptual model of the process of adjustment to childhood cancer |
| McEwan, Espie, Metcalfe, Brodie, & Wilson (2004)  United Kingdom | To describe the experience of having epilepsy in adolescence; Understand perceived impact of epilepsy on QOL; Explore changes in QOL issues as adolescents progress towards adulthood; Present a conceptual framework for understanding the impact of epilepsy in adolescence | Qualitative | 22 adolescents with epilepsy | Derived | QOL and identity formation in adolescents with epilepsy |
| Moffat, Dorris, Connor, & Espie (2009)  United Kingdom | To investigate the impact of childhood epilepsy on QOL directly from the child’s perspective | Qualitative | 22 children with epilepsy | Derived | QOL in children with epilepsy. |
| Motl, McAuley, & Snook (2007)  United States | To examine relationships among self-efficacy, functional limitations, physical activity, and QOL in participants with multiple sclerosis | Descriptive | 196 individuals with multiple sclerosis | Derived | Analysis linking concepts with quality of life |
| Perez, Huang, Jansky, Nowinski, Victorson, Peterman, et al. (2007)  United States | To confirm conceptualization of QOL domains underlying the Neuro-QOL instrument using focus groups. To examine HRQOL for patients with neurological conditions | Qualitative | 64 patients and 19 caregivers of those with neurological diagnoses (Alzheimers, Multiple Sclerosis, Amyotrophic lateral sclerosis, Parkinson's, stroke, epilepsy) | Derived | HRQOL domains and subdomains across neurological disorders |
| Smith Lamping, Banerjee, Harwood, Foley, Smith et al. (2005)  United Kingdom | To develop and validate a measure of HRQOL for persons with dementia | Instrument development | 241 people with dementia and 225 carers of persons w/dementia | Derived | Dementia HRQOL Conceptual framework derived from literature, qualitative interviews, expert opinion, and team discussion. |
| Smith, Murray, Banerjee, Foley, Cook, et al. (2005)  United Kingdom | To understand HRQOL in people with dementia and examine differences between self-report and family caregiver descriptions of HRQOL | Qualitative | 19 people with dementia and 16 caregivers | Derived | Dementia HRQOL Conceptual framework developed based on literature and qualitative data. |
| Sousa & Chen, (2003)  United States | To demonstrate latent mean structure analysis as a technique to compare group differences in a QOL model | Descriptive | 924 HIV+ patients | Derived | Hypothesized conceptual model representing QOL. |
| Swigris, Stewart, Gould, & Wilson (2005)  United States | To 1) gain insight into effects of idiopathic pulmonary fibrosis on patients’ lives; 2) organize the effects into a conceptual framework; 3) examine whether 4 existing instruments capture the elements of the framework; 4) examine the extent that the 4 instruments include irrelevant items to patients with idiopathic pulmonary fibrosis | Qualitative | 20 patients with idiopathic pulmonary fibrosis | Derived | HRQOL in patients with idiopathic pulmonary fibrosis |
| Urbach, Harnish, & Long (2005)  Canada | To develop a conceptual framework of QOL after abdominal surgery | Qualitative | 21 post-operative patients | Derived | Short term HRQOL after abdominal surgery |
| Urbanoski, Cairney, Adlaf, & Rush (2007)  Canada | To propose and test a conceptual model of QOL in severely mentally ill consumers | Descriptive | 133 severely mentally ill adults | Derived | QOL model involving substance abuse, psychiatric symptoms, and distress. |
| White, Lauzon, Yaffe, & Wood-Dauphinee (2004)  United States | To describe QOL of caregivers of stroke survivors and to identify associated factors | Literature review | NA | Derived | QOL for family caregivers of stroke survivors |
| Cummins (2005)  Australia | To update statements defining QOL to reflect the emerging areas of agreement from the Special Interest Quality of Life Group | Consensus paper | NA | Derived | Conceptual model of well-being  (not disease-specific) |

**Supplementary Table B: Subset of 52 Articles Guided by Existing Models Used Once or Twice. Models used twice were Maslow (n=2), Mishel (n = 2), and Stewart (n=2).**

| **Authors**  **(Year)**  **Country** | **Purpose** | **Design** | **Sample** | **Model guided or derived** | **Model used** |
| --- | --- | --- | --- | --- | --- |
| Collins, Lanham, & Sigford (2000)  United States | To examine the psychometric properties of the Wisconsin HSS Quality of Life Inventory | Instrument development | 414 individuals with traumatic brain injury | Guided | **Maslow's** Theory of Human Needs |
| Scholzel-Dorenbos, Meeuwsen, & Olde Rikkert (2010)  Netherlands | (1) To inventory needs assessment instruments in dementia, (2) Explore interaction between unmet needs & HRQOL; (3) to relate needs and HRQOL to Maslow's model to design a dementia specific model | Literature review | NA | Guided  Derived | **Maslow's** Hierarchy of Needs Model used to derive a dementia specific model |
| Detprapon, Sirapo-ngam, Mishel, Sitthimongkol, & Vorapongsathorn (2009)    Thailand | To test Mishel’s Uncertainty in Illness Theory to determine factors influencing QOL in persons with head and neck cancer | Descriptive | 250 head and neck cancer patients in Thailand | Guided | **Mishel’s** Uncertainty in Illness Theory combined with concept of religious participation as a structure provider |
| Wallace (2003)  United States | To explore uncertainty, anxiety, health-related QOL and affective QOL in men undergoing watchful waiting for prostate cancer | Descriptive | 19 men with prostate cancer | Guided | **Mishel’s** Uncertainty in Illness Model |
| Stewart, Teno, Patrick, & Lynn (1999)  United States | To present a general conceptual framework to facilitate the development of measures to describe QOL of dying persons in the context of health care | Literature review | NA | Guided | **Stewart’**s conceptual framework of dying patients and families combining quality of life and quality of health care indicators |
| Tang, Aaronson, & Forbes (2004)  United States | To evaluate correlates of QOL in patients with terminal illness | Descriptive | 60 hospice patients | Guided | **Stewart’s** conceptual model of factors affecting dying patients and families |
| Bailey (2001)  Canada,  United States | To assemble information on health status factors, therapeutic strategies, and QOL among persons with asthma. To make empirical generalizations about the selected variables from a universe of studies. | Descriptive | Meta-analytical findings from three studies involving persons with asthma (total N = 811) | Guided | Asthma QOL Model (comprised of health status factors, therapeutic strategies, and QOL) |
| Barrera, Wayland, D'Agostino, Gibson, Weksberg, & Malkin (2003)  Canada | To investigate age differences in psychological adjustment & HRQOL, and to identify predictors of psychological adjustment & HRQOL among preschool, school age, and adolescent patients with cancer | Descriptive | 69 preschool, school age, and adolescent patients with cancer | Guided | Model based on earlier conceptualizations and research with children with chronic illnesses |
| Bjornson & McLaughlin (2001)  United States | To present descriptive HRQOL studies of children with moderate to severe cerebral palsy and to compare children with quadriplegia, diplegia and hemiplegia. | Literature review | NA | Guided | Five part conceptual framework modified from prior models by the World Health Organization and the National Center for Medical Rehabilitation Research. |
| Bluvol (2003)  Canada | To examine relationships among hope, family health promoting activity, and QOL among stroke survivors and their spouses. | Descriptive | 40 stroke survivors and their spouses | Guided | Developmental Model of Health and Nursing |
| Carlsson & Hamrin (2002)  Sweden | To perform confirmatory factor analyses of the Life Satisfaction Questionnaire in women with breast cancer | Instrument development | 362 women with breast cancer and 520 men and women without cancer | Guided | Model consisted of 5 dimensions of QOL based on a review of literature focused on women with breast cancer |
| Chamlin, Cella, Frieden, Williams, Mancini, Lai, et al. (2005)  United States | To develop the Childhood Atopic Dermatitis Impact Scale to measure the effects of atopic dermatitis on the quality of life of affected young children and their families. | Instrument development | 270 families of children with atopic dermatitis | Guided | Effect of Atopic Dermatitis on QOL conceptual framework |
| Chaudhury (2003)  United States | To explore reminiscence of personally meaningful past places (i.e., place therapy) among cognitively intact and impaired residents in 4 nursing homes. | Qualitative | 21 nursing home residents (8 cognitively intact, 13 with dementia) and 15 family members of those with dementia | Guided Derived | Lawton’s Quality of Life Conceptual Model |
| Costantini, Mencaglia, Giulio, Cortesi, Roila, Ballatori, et al. (2000)  Italy | To identify contents of QOL domains using cancer patients as experts | Instrument development | 248 cancer patients | Guided | Conceptual framework with domains identified by the Italian Society of Psycho-Oncology |
| da Silva Caralho Villa & Rossi (2008)  Brazil | To understand the meaning of QOL in people with coronary artery bypass grafting and their relatives | Qualitative | 11 adults who experienced coronary artery bypass grafting and 10 relatives | Guided | Conceptual Model of Quality of Life of the Centre for Health Promotion, University of Toronto |
| Dow, Ferrell, Haberman, & Eaton (1999)  United States | To describe the meaning of quality of life in long-term cancer survivors, validate inductively derived QOL themes, and identify and cluster over-arching themes across long-term cancer survivors | Qualitative | 687 cancer survivors | Guided Derived | Conceptual Model based on investigator’s previous research with cancer patients |
| Echteld, van Elderen, & van der Kamp (2001)  Netherlands | To improve understanding of quality of life outcomes related to percutaneous trans luminal coronary angioplasty (PTCA) by investigating relationships between predictors and correlates of QOL of patients waiting for PTCA | Correlational | 122 percutaneous trans luminal coronary angioplasty patients | Guided | Working model was derived from Maes’ coping with chronic illness model |
| Hafslund & Nortvedt (2009)  Norway | To explore how women attending a national mammography screening program reacted to the screening process on QOL | Literature review | NA | Guided | Spilker's domains of HRQOL |
| Hatzmann, Maurice-Stam, Heymans, & Grootenhuis (2009)  Netherlands | To explore the influence of demographic and disease-related factors on parental HRQOL, mediated by employment, income, leisure time, holiday, and emotional support | Correlational | 543 parents of chronically ill children | Guided | Model constructed based on literature focused on parents of chronically ill children |
| Hollen, Gralla, Liepa, Symanowski, & Rusthoven (2006)  Canada, United States, Western Europe | To adapt and test a modified version of the Lung Cancer Symptoms Scale for patients with pleural mesothelioma | Instrument development | 495 patients with mesothelioma | Guided | Lung Cancer Symptom Scale QOL Model |
| Jenerette (2008)  United States | To examine relationships among types of social support and HRQOL | Correlational | 232 adults with sickle cell disease | Guided | Theory of Self-Care Management for Sickle Cell Disease |
| Keenan, McKenna, Doward, Conaghan, Emery, Tennant (2008)  United Kingdom | To develop and validate a disease-specific QOL measure for osteoarthritis (OA), the OAQOL, using a needs-based conceptual model | Instrument development | Phase 1 - 44 OA patients; Phase 2 - 17 OA patients; Phase 3 - 259 OA patients; Phase 4 - 60 OA patients for test-retest reliability | Guided | A needs-based approach based on QOL domains derived from qualitative interviews |
| King, Kinney, & Marks (2009)  Australia | To understand relationships between asthma control and HRQOL and to test a conceptual model | Correlational | 213 people with asthma | Guided Derived | Asthma control and HRQOL model based on literature |
| Koller, Klinkhammer-Schalke, & Lorenz (2005)  Germany | To improve the conceptual frameworks that allow the use of the QOL concept in clinical practice | Literature review | NA | Guided | Integrating medical paradigm and disease-related QOL: A 3 component model (classical endpoints, hermeneutic endpoints, clinical relevance) |
| Leung, Liu, Zhao, Fang, Chan, & Lin (2005)  China | To develop the Chinese Quality of Life Instrument | Instrument development | 100 Chinese medicine practitioners | Guided Derived | Adopted concept of health involving harmonization of (a) physical form and spirit (b) man and society (c) man and nature (d) emotions |
| Lim, Yi, & Zebrack (2008)  United States | To examine direct and/or indirect pathways among acculturation, social support, depressive symptoms, and QOL among Korean immigrant breast and gynecological cancer survivors | Correlational | 51 female immigrants with breast or gynecological cancer | Guided Derived | Berkman’s social network model |
| Lipscomb, Snyder, & Gotay (2007)  United States | To summarize & draw inferences from the Cancer Outcomes Measurement Working Group findings about the soundness of HRQOL assessments in cancer | Literature review | NA | Guided | Medical Outcomes Trust Framework |
| Marden (2005)  United States | To present a new theoretical model to explain people’s diverse responses to therapeutic health technology by characterizing the relationship between technology dependence and HRQOL | Literature review | NA | Guided | Technology dependence and HRQOL model: based on (a) Sandelowski’s conceptual framework of technology dependence in health care, (b) Spilker’s relationship of clinical aspects of safety and efficacy data and QOL and (c) Leventhal et al.s’ self-regulation model of illness cognition and behaviour |
| Menne, Judge, & Whitlatch (2009)  United States | To identify predictors of QOL in individuals with dementia | Descriptive | 211 individuals with dementia | Guided | Model based on stress and coping literature |
| Nesbitt & Heidrich (2000)  United States | To test a conceptual model of proposed relationships between physical health limitation, the sense of coherence, illness appraisal, and QOL in older women | Descriptive | 137 older women | Guided Derived | A stress and coping framework, the Salutogenic Model |
| Noonan, Kopek, Zhang, & Dvorak (2008)  Canada | To determine the effect of associated spinal cord injury conditions on the health status and QOL in people with traumatic central cord syndrome | Descriptive | 70 people with traumatic central cord syndrome | Guided | Conceptual model developed by investigators based on the literature |
| Northouse, Mood, Montie, Sandler, Forman, Hussain, et al, (2007)  United States | To assess patients’ and spouses’ QOL, appraisal of illness, resources, symptoms, and risk for distress across three phases of prostate cancer | Descriptive | 263 prostate cancer patient-spouse dyads | Guided | Lazarus and Folkman stress and coping theory |
| Paschoal, Filho, & Litvoc (2007)  Brazil | To develop a QOL measure for elderly people | Instrument development | 105 elderly individuals | Guided Derived | Quality of Life in old age |
| Paskett, Herndon, Day, Stark, Winer, Grubbs, et al. (2008)  United States | To identify factors related to global HRQOL & identify problems and health-oriented behaviors | Descriptive | 245 women with breast cancer | Guided Derived | QOL model adapted by Dow and colleagues |
| Perrins-Margalis, Rugletic, Schepis, Stepanski, & Walsh (2000)  United States | To study the impact of horticulture on group participants with chronic mental illness in a clubhouse facility | Qualitative | 10 people with chronic mental illness | Guided Derived | Zhan's conceptual model of QOL (life satisfaction, self-concept, health and functioning, socioeconomic) |
| Petry, Maes, & Vlaskamp (2005)  Netherlands | To examine the validity of basic domains of QOL that appear in theoretical models for people with profound multiple disabilities | Qualitative | 76 parents and support staff of people with profound multiple disabilities | Guided | Felce and Perry Model consisting of 5 basic domains |
| Rabins, Kasper, Kleinman, Black, & Patrick (1999)    United States | To describe a conceptual framework and development of the Alzheimer's Disease-Related Quality of Life instrument | Instrument development | 11 experts and 12 family caregivers | Guided | Model containing HRQOL concepts and domains specific to daily lives of persons with dementia |
| Rebollo & Ortega (2002)  Spain | To analyze literature on HRQOL in end-stage renal disease patients | Literature review | NA | Guided | An applied conceptual model of HRQOL. |
| Renwick, Nourhaghighi, Manns, & Rudman (2003)  Canada | To develop & validate an instrument called QOL Profile for Adults with Physical Disabilities | Instrument development | 27 adults with physical disabilities (Study 1), 40 adults with physical disabilities (Study 2) | Guided | Center for Health Promotion Quality of Life Model |
| Sato, Saito, Nakamura-Miura, Kato, & Cathcart (2007)  Japan, Canada | To incorporate dental hygiene human needs model and the oral health related QOL model into the dental hygiene curriculum in Japan | Randomized controlled trial | 67 dental hygiene students in Japan | Guided | Dental hygiene human needs model; Oral health related QOL model |
| Schlarmann, Metzing-Blau, & Schnepp (2008)  Germany | To review literature on concept, common definition, and assessment of HRQOL in children, relevance of HRQOL measures to young carers, and create recommendations for instrumentation in Germany. | Literature review | NA | Guided | Authors used core HRQOL domains by von Ruden to guide the review. |
| Shi, Sun, Cai, & Yang (2004)  China | To develop and validate a QOL scale for Chinese patients with benign prostatic hypertrophy | Descriptive | 256 men with benign prostatic hypertrophy; 60 randomly sampled to repeat assessment 2nd time; 43 healthy matched men | Guided | Model formulated from literature search, semi-structured interviews, and HRQOL domains. |
| Simon, Chan, & Forrest (2008)  United States | To examine biological, medical system, & socio-demographic factors associated with HRQOL as measured by a multi-dimensional index that accounts for a wide range of child health domains | Descriptive | 69,031 caregivers of children from the National Survey of Children's Health | Guided | Child Health and Illness Profile |
| Skevington, Day, Chisholm, & Trueman (2005)  United Kingdom | To (1) find whether general practitioners use QOL information in primary care & explore their reasoning & barriers to use; (2) to determine if transtheoretical model of behavior change can be applied to the doctor's use of QOL information in primary care | Descriptive | 800 general practitioners | Guided | Transtheoretical Model of Behavior Change |
| Skevington, Norweg, & Standage (2010)  Austrailia, Brazil, India, Italy, Thailand, Ukraine | To test a revised QOL model | Descriptive | 1281 people with HIV or AIDS | Guided Derived | Chronic Illness Quality of Life Model using WHO QOL-HIV instrument |
| Smith, Sim, Schari, & Phillipson (2004)  United Kingdom | To examine determinants of QOL among those in deprived neighborhoods | Correlational | 600 adults in deprived neighborhoods | Guided | Berlin Aging Model |
| Spiegel, Melmed, Robbins, Esrailian (2008)  United States | To review literature on HRQOL in end stage renal disease patients | Literature review | NA | Guided | Evaluated data according to a mathematical model involving biomarkers of clinical outcomes and QOL |
| Sprangers & Schwartz (1999)  Netherlands, United States | To present a model integrating response shift into HRQOL | Literature review | NA | Guided | Theoretical model of response shift and QOL |
| Townshend, Dorris, McEwan, Aylett, Brodie, O'Regan, et al. (2008)  United Kingdom | To validate a measure of the impact of epilepsy on adolescent QOL | Descriptive | 108 adolescents with epilepsy | Guided | McEwan et al conceptual model of QOL in epilepsy |
| Tully, Baker, Turnbull, Winefield, & Knight (2009)  Australia | To examine the impact of general stress, depression and anxiety on HRQOL after coronary artery bypass graft (CABG) surgery. | Descriptive | 193 coronary artery bypass graft patients | Guided | Tripartite model of depression and anxiety |
| Ward & Tanner (2010)  United States | To examine the relationship of migrant farmworker stress to HRQOL | Descriptive | 75 migrant farmworkers | Guided | Ecological model of health determinants specific to migrant farmworkers |
| Yeh & Hung (2003)  Taiwan | To test the convergent, discriminant, and clinical validity of the QOLCC instrument for measuring the QOL of Taiwanese children who suffer from cancer. | Instrument development | 160 children with cancer and 129 caregivers | Guided | Conceptual framework based on grounded theory: health-related problems are solved from both a bio-medical and bio-behavioral perspective. |

**References for the 100 full-text articles reviewed:**

Bailey CB: **Testing an asthma quality of life model.** *J Theory Const Testing* 2001*,* **5:**38-44.

Baker SR, Pankhurst CL, Robinson PG: **Testing relationships between clinical and non-clinical variables in xerostomia: a structural equation model of oral health-related quality of life.** *Qual Life Res* 2007,**16:**297-308. doi: 10.1007/s11136-006-9108-x

Bandell-Hoekstra, I Abu-Saad HH, Passchier J, Knipschild P: **Recurrent headache, coping, and quality of life in children: a review.** *Headache* 2000,**40:**357-370. doi: hed54 [pii]

Barr J, Schumacher G: **Using focus groups to determine what constitutes quality of life in clients receiving medical nutrition therapy: first steps in the development of a nutrition quality-of-life survey.** *J Am Diet Assoc* 2003*,* **103:**844-851. doi:10.1053/jada.2003.50170 S0002822303003857 [pii]

Barrera M, Wayland L, D'Agostino NM, Gibson J, Weksberg R, Malkin D: **Developmental differences in psychological adjustment and health-related quality of life in pediatric cancer patients.** *Child Health Care* 2003*,* **32:**215-232.

Bjornson KF, McLaughlin JF: **The measurement of health-related quality of life (HRQL) in children with cerebral palsy.** *Eur J Neurol* 2001, **8(**Suppl 5): 183-193. doi: 051 [pii]

Bluvol A: **The Codman Award Paper: quality of life in stroke survivors and their spouses: predictors and clinical implications for rehabilitation teams.** *Axone* 2003*,* **25**:10-19.

Brod M, Perwien A, Adler L, Spencer T, Johnston J: **Conceptualization and assessment of quality of life for adults with attention-deficit/hyperactivity disorder.** *Primary Psychiatry* 2005*,* **12:**58-64.

Carlsson M, Hamrin E: **Evaluation of the life satisfaction questionnaire (LSQ) using structural equation modelling (SEM).** *Qual Life Res* 2002*,* **11:**415-425.

Chamlin SL, Cella D, Frieden IJ, Williams ML, Mancini AJ, Lai JS, et al: **Development of the Childhood Atopic Dermatitis Impact Scale: initial validation of a quality-of-life measure for young children with atopic dermatitis and their families.** *J Invest Dermatol* 2005*,* **125:**1106-1111. doi: JID23911 [pii]10.1111/j.0022-202X.2005.23911.x

Chan SH, Yeung FK: **Path models of quality of life among people with schizophrenia living in the community in Hong Kong.** *Community Ment Health J* 2008*,* **44:**97-112. doi: 10.1007/s10597-007-9114-7

Chaudhury H: **Quality of life and place-therapy.** In *Physical environments and aging: Critical contributions of M. Powell Lawton to theory and practice.* Edited by Scheidt RJ, Windley PG. New York: Haworth Press; 2003:85-103.

Chin MH, Polonsky TS, Thomas VD, Nerney MP: **Developing a conceptual framework for understanding illness and attitudes in older, urban African Americans with diabetes.** *Diabetes Educ* 2000*,* **26:**439-449.

Collins R, Lanham RA Jr, Sigford BJ: **Reliability and validity of the Wisconsin HSS Quality Of Life inventory in traumatic brain injury.** *J Head Trauma Rehabil* 2000*,* **15**:1139-1148.

Cosby C, Holzemer WL, Henry SB, Portillo CJ: **Hematological complications and quality of life in hospitalized AIDS patients.** *AIDS Patient Care STDS* 2000*,* **14**:269-279. doi: 10.1089/108729100317731

Costantini M, Mencaglia E, Giulio PD, Cortesi E, Roila F, Ballatori E, et al: **Cancer patients as 'experts' in defining quality of life domains. A multicentre survey by the Italian Group for the Evaluation of Outcomes in Oncology (IGEO).** *Qual Life Res* 2000*,* **9**: 151-159.

Cummins R A: **Moving from the quality of life concept to a theory.** *J Intellect Disabil Res* 2005*,* **49**:(Pt 10),699-706. doi: JIR738 [pii]10.1111/j.1365-2788.2005.00738.x

daSilva Carvalho Vila V, Rossi LA: **Quality of life from the perspective of revascularized patients during rehabilitation: An ethnographic study.** *Revista Latino-Americana de Enfermagem* 2008*,* **16:**7-14.

Daggett V, Bakas T, Habermann B: **A review of health-related quality of life in adult traumatic brain injury survivors in the context of combat veterans.** *J Neurosci Nurs* 2009*,* **41:**59-71.

Detprapon M, Sirapo-ngam Y, Mishel MH, Sitthimongkol Y, Vorapongsathorn T: **Testing of uncertainty in illness theory to predict quality of life among Thais with head and neck cancer.** *Thai Journal of Nursing Research* 2009*,* **13:**1-14.

Dow KH, Ferrell BR, Haberman MR, Eaton L: **The meaning of quality of life in cancer survivorship.** *Oncol Nurs Forum* 1999*,* **26:**519-528.

Echteld MA, van Elderen T, van der Kamp LJT: **How goal disturbance, coping and chest pain relate to quality of life: A study among patients waiting for PTCA.** *Quality of Life Research: An International Journal of Quality of Life Aspects of Treatment, Care & Rehabilitation* 2001*,* **10:**487-501. doi: 10.1023/a:1013083620565

Edwards TC, Huebner CE, Connell FA, Patrick DL: **Adolescent quality of life, part I: conceptual and measurement model.** *J Adolesc* 2002*,* **25**:275-286. doi: S0140197102904707 [pii]

Ferrans CE, Zerwic JJ, Wilbur JE, Larson JL: **Conceptual model of health-related quality of life.** *J Nurs Scholarsh* 2005*,* **37**:336-342.

Fischer JS, LaRocca NG, Miller DM, Ritvo PG, Andrews H, Paty D: **Recent developments in the assessment of quality of life in multiple sclerosis (MS).** *Mult Scler* 1999*,* **5:**251-259.

Frank A, Auslander GK, Weissgarten J: **Quality of life of patients with end-stage renal disease at various stages of the illness.** *Soc Work Health Care* 2003*,* **38:**1-27.

Hafslund B, Nortvedt MW: **Mammography screening from the perspective of quality of life: a review of the literature.** *Scandinavian Journal of Caring Sciences* 2009*,* **23:**539-548.

Hatzmann J, Maurice-Stam H, Heymans HS, Grootenhuis MA: **A predictive model of Health Related Quality of life of parents of chronically ill children: the importance of care-dependency of their child and their support system.** *Health Qual Life Outcomes* 2009*,* **7:**72. doi: 1477-7525-7-72 [pii]10.1186/1477-7525-7-72

Hays RD, Hahn H, Marshall G: **Use of the SF-36 and other health-related quality of life measures to assess persons with disabilities**. *Arch Phys Med Rehabil* 2002*,* **83**(Suppl 2):S4-9. doi: 10.1007/s11136-009-9496-9

Hill PD, Aldag JC, Hekel B, Riner G, Bloomfield P: **Maternal Postpartum Quality of Life Questionnaire.** *J Nurs Meas* 2006*,* **14:**205-220.

Hofer S, Benzer W, Alber H, Ruttmann E, Kopp M, Schussler G, et al: **Determinants of health-related quality of life in coronary artery disease patients: a prospective study generating a structural equation model.** *Psychosomatics* 2005*,* **46**:212-223. doi: 46/3/212 [pii]10.1176/appi.psy.46.3.212

Hollen PJ, Gralla RJ, Liepa AM, Symanowski JT, Rusthoven JJ: **Measuring quality of life in patients with pleural mesothelioma using a modified version of the Lung Cancer Symptom Scale (LCSS): psychometric properties of the LCSS-Meso.** *Support Care Cancer* 2006*,* **14:**11-21. doi: 10.1007/s00520-005-0837-0

Janz NK, Janevic MR, Dodge JA, Fingerlin TE, Schork MA, Mosca LJ, et al: **Factors influencing quality of life in older women with heart disease.** *Med Care* 2001*,* **39:** 588-598.

Jenerette CM: **Relationships among types of social support and QOL in adults with sickle cell disease.** *Southern Online Journal of Nursing Research* 2008*,* **8:**14.

John MT: **Exploring dimensions of oral health-related quality of life using experts' opinions.** *Qual Life Res* 2007*,* **16**:697-704. doi: 10.1007/s11136-006-9150-8

Julkunen J, Gustavsson-Lilius M, Hietanen P: **Anger expression, partner support, and quality of life in cancer patients.** *J Psychosom Res* 2009*,* **66**:235-244. doi: S0022-3999(08)00436-4 [pii]10.1016/j.jpsychores.2008.09.011

Keenan AM, McKenna SP, Doward LC, Conaghan PG, Emery P, Tennant A: D**evelopment and validation of a needs-based quality of life instrument for osteoarthritis.** *Arthritis Rheum* 2008*,* **59:**841-848. doi: 10.1002/art.23714

Keller HH: **Nutrition and health-related quality of life in frail older adults.** *J Nutr Health Aging* 2004*,* **8:**245-252.

Kelley-Gillespie N: **An integrated conceptual model of quality of life for older adults based on a synthesis of the literature.** *Applied Research in Quality of Life* 2009*,* **4:**259-282. doi: 10.1007/s11482-009-9075-9

King CR, Hinds P, Dow KH, Schum L, Lee C: **The nurse's relationship-based perceptions of patient quality of life.** *Oncol Nurs Forum* 2002*,* **29:**E118-126. doi: 10.1188/02.ONF.E118-E126

King MT, Kenny PM, Marks GB: **Measures of asthma control and quality of life: longitudinal data provide practical insights into their relative usefulness in different research contexts.** *Qual Life Res 2009,* **18:**301-312. doi: 10.1007/s11136-009-9448-4

Klassen AF, Pusic AL, Scott A, Klok, J, Cano, SJ: **Satisfaction and quality of life in women who undergo breast surgery: a qualitative study.** *BMC Womens Health* 2009*,* **9:**11. doi: 1472-6874-9-11 [pii]10.1186/1472-6874-9-11

Koller M, Klinkhammer-Schalke M, Lorenz W: **Outcome and quality of life in medicine: a conceptual framework to put quality of life research into practice.** *Urol Oncol* 2005*,* **23**, 186-192. doi: S1078-1439(05)00026-8 [pii]10.1016/j.urolonc.2005.03.002

Krethong P, Jirapaet V, Jitpanya C, Sloan R: **A causal model of health-related quality of life in Thai patients with heart-failure.** *J Nurs Scholarsh* 2008*,* **40:**254-260. doi: JNU235 [pii] 10.1111/j.1547-5069.2008.00235.x

Leung KF, Liu FB, Zhao L, Fang JQ, Chan K, Lin LZ: **Development and validation of the Chinese Quality of Life Instrument.** *Health Qual Life Outcomes* 2005*,* **3:**26. doi: 1477-7525-3-26 [pii]10.1186/1477-7525-3-26

Lim JW, Yi J, Zebrack B: **Acculturation, social support, and quality of life for Korean immigrant breast and gynecological cancer survivors.** *Ethn Health* 2008*,* **13:**243-260. doi: 793437541 [pii]10.1080/13557850802009488

Lipscomb J, Snyder CF, Gotay CC: **Cancer outcomes measurement.** *Qual Life Res* 2007*,*

**16:**143-164. doi: 10.1007/s11136-006-9116-x

Lopez ED, Eng E, Randall-David E, Robinson N: **Quality-of-life concerns of African American breast cancer survivors within rural North Carolina: blending the techniques of photovoice and grounded theory.** *Qual Health Res* 2005*,***15:**99-115. doi: 15/1/99 [pii]10.1177/1049732304270766

Marden SF: **Technology dependence and health-related quality of life: a model.** *J Adv Nurs* 2005*,* **50:**187-195. doi: JAN3378 [pii]10.1111/j.1365-2648.2005.03378.x

Mathias SD, Gao SK, Miller KL, Cella D, Snyder C, Turner R, et al: **Impact of chronic Immune Thrombocytopenic Purpura (ITP) on health-related quality of life: a conceptual model starting with the patient perspective.** *Health Qual Life Outcomes* 2008*,* **6:**13. doi: 1477-7525-6-13 [pii]10.1186/1477-7525-6-13

Mathisen L, Andersen MH, Veenstra M, Wahl AK, Hanestad BR, Fosse E: **Quality of life can both influence and be an outcome of general health perceptions after heart surgery.** *Health Qual Life Outcomes* 2007*,* **5:**27. doi: 1477-7525-5-27 [pii]10.1186/1477-7525-5-27

Maurice-Stam H, Oort FJ, Last BF, Grootenhuis MA: **A predictive model of health-related quality of life in young adult survivors of childhood cancer.** *European Journal of Cancer Care* 2009*,* **18:**339-349. doi: 10.1111/j.1365-2354.2007.00916.x

McEwan MJ, Espie CA, Metcalfe J, Brodie MJ, Wilson MT: **Quality of life and psychosocial development in adolescents with epilepsy: a qualitative investigation using focus group methods.** *Seizure* 2004**13**:15-31. doi:S1059131103000803 [pii]

Menne HL, Judge KS, Whitlatch CJ: **Predictors of quality of life for individuals with dementia: Implications for intervention.** *Dementia: The International Journal of Social Research and Practice* 2009*,* **8:**543-560.

Moffat C, Dorris L, Connor L, Espie CA: **The impact of childhood epilepsy on quality of life: a qualitative investigation using focus group methods to obtain children's perspectives on living with epilepsy.** *Epilepsy Behav* 2009*,* **14:**179-189. doi: S1525-5050(08)00304-1 [pii]10.1016/j.yebeh.2008.09.025

Motl RW, McAuley E, Snook EM: **Physical activity and quality of life in multiple sclerosis: possible roles of social support, self-efficacy, and functional limitations.** *Rehabilitation Psychology* 2007*,* **52:**143-151.

Nesbitt BJ, Heidrich SM: **Sense of coherence and illness appraisal in older women's quality of life.** *Res Nurs Health* 2000*,* **23:** 25-34. doi: 10.1002/(SICI)1098-240X(200002)23:1<25::AID-NUR4>3.0.CO;2-M [pii]

Noonan VK, Kopec JA, Zhang H, Dvorak MF: **Impact of associated conditions resulting from spinal cord injury on health status and quality of life in people with traumatic central cord syndrome.** *Arch Phys Med Rehabil* 2008*,* **89:**1074-1082. doi: S0003-9993(08)00173-1 [pii]10.1016/j.apmr.2007.10.041

Northouse LL, Mood DW, Montie JE, Sandler HM, Forman JD, Hussain M, et al: **Living with prostate cancer: patients' and spouses' psychosocial status and quality of life.** *J Clin Oncol* 2007*,* **25:**4171-4177. doi: JCO.2006.09.6503 [pii]10.1200/JCO.2006.09.6503

Orfila F, Ferrer M, Lamarca R, Tebe C, Domingo-Salvany A, Alonso J: **Gender differences in health-related quality of life among the elderly: the role of objective functional capacity and chronic conditions.** *Soc Sci Med* 2006*,* **63:**2367-2380. doi: S0277-9536(06)00312-1 [pii]10.1016/j.socscimed.2006.06.017

Paschoal SM, Filho WJ, Litvoc J: **Development of elderly quality of life index - EQOLI: theoretical-conceptual framework, chosen methodology, and relevant items generation.** *Clinics (Sao Paulo)* 2007*,* **62:**279-288. doi: S1807-59322007000300012 [pii]

Paskett E, Herndon II J, Day J, Stark N, Winer E, Grubbs S, et al**: Applying a conceptual model for examining health-related quality of life in long-term breast cancer survivors: CALGB study 79804**. *Psycho-oncology* 2008*,* **17:**1108-1120.

Penckofer S, Ferrans CE, Fink N, Barrett ML, Holm K: **Quality of life in women following coronary artery bypass graft surgery.** *Nurs Sci Q* 2005*,* **18:**176-183. doi: 18/2/176 [pii]10.1177/0894318405274832

Perez L, Huang J, Jansky L, Nowinski C, Victorson D, Peterman, A, et al: **Using focus groups to inform the Neuro-QOL measurement tool: exploring patient-centered, health-related quality of life concepts across neurological conditions.** *J Neurosci Nurs* 2007*,* **39:**342-353.

Perrins-Margalis NM, Rugletic J, Schepis NM, Stepanski HR, Walsh MA: **The immediate effects of a group-based horticulture experience on the quality of life of persons with chronic mental illness.** *Occupational Therapy in Mental Health* 2000*,* **16:**15-32.

Petchprapai N, Winkelman C: **Mild traumatic brain injury: determinants and subsequent quality of life. A review of the literature.** *J Neurosci Nurs* 2007*,* **39:**260-272.

Petry K, Maes B, Vlaskamp C: **Domains of quality of life of people with profound multiple disabilities: The perspective of parents and direct support staff.** *Journal of Applied Research in Intellectual Disabilities* 2005*,* **18:**35-46. doi:10.1111/j.1468-3148.2004.00209.x

Post MW, de Witte LP, Schrijvers AJ: **Quality of life and the ICIDH: towards an integrated conceptual model for rehabilitation outcomes research.** *Clin Rehabil* 1999*,* **13:**5-15.

Rabins PV, Kasper JD, Kleinman L, Black BS, Patrick DL: **Concepts and methods in the development of the ADRQL: an instrument for assessing health-related quality of life in persons with Alzheimer's disease.** *Journal of Mental Health & Aging* 1999*,* **5:** 33-48.

Rebollo P, Ortega F: **New trends on health related quality of life assessment in end-stage renal disease patients.** *Int Urol Nephrol* 2002*,* **33:**195-202.

Renwick R, Nourhaghighi N, Manns PJ, Rudman DL: **Quality of life for people with physical disabilities: a new instrument.** *Int J Rehabil Res* 2003*,* **26**:279-287. doi: 10.1097/01.mrr.0000102066.48781.a2

Sato Y, Saito A, Nakamura-Miura A, Kato E, Cathcart G: **Application of the Dental Hygiene Human Needs conceptual model and the oral Health-Related Quality of Life Model to the dental hygiene curriculum in Japan.** *Int J Dent Hyg* 2007*,* **5:**158-164. doi: IDH235 [pii]10.1111/j.1601-5037.2007.00235.x

Schlarmann JG, Metzing-Blau S, Schnepp W: **The use of health-related quality of life (HRQOL) in children and adolescents as an outcome criterion to evaluate family oriented support for young carers in Germany: an integrative review of the literature.** *BMC Public Health* 2008*,* **8:**414. doi: 1471-2458-8-414 [pii]10.1186/1471-2458-8-414

Scholzel-Dorenbos CJ, Meeuwsen EJ, Olde Rikkert MG: **Integrating unmet needs into dementia health-related quality of life research and care: Introduction of the Hierarchy Model of Needs in Dementia.** *Aging Ment Health* 2010*,* **14:**113-119. doi: 919231180 [pii]10.1080/13607860903046495

Shi J, Sun Z, Cai T, Yang L: **Development and validation of a quality-of-life scale for Chinese patients with benign prostatic hyperplasia.** *BJU Int* 2004*,* **94:**837-844. doi: BJU5043 [pii]10.1111/j.1464-410X.2004.05043.x

Simon AE, Chan KS, Forrest CB: **Assessment of children's health-related quality of life in the United States with a multidimensional index.** *Pediatrics* 2008*,* **121:** e118-126. doi: peds.2007-0480 [pii] 10.1542/peds.2007-0480

Skevington SM, Day R, Chisholm A, Trueman P: **How much do doctors use quality of life information in primary care? Testing the trans-theoretical model of behaviour change.** *Qual Life Res* 2005*,* **14:**911-922. doi: 10.1080/09540120903311466

Skevington SM, Norweg S, Standage M: **Predicting quality of life for people living with HIV: international evidence from seven cultures.** *AIDS Care* 2010*,* **22:**614-622.

Smith AE, Sim J, Scharf T, Phillipson C: **Determinants of quality of life amongst older people in deprived neighbourhoods.** *Ageing & Society* 2004*,* **24:**793-814. doi: 10.1017/s0144686x04002569

Smith SC, Lamping DL, Banerjee S, Harwood R, Foley B, Smith P, et al: **Measurement of health-related quality of life for people with dementia: development of a new instrument (DEMQOL) and an evaluation of current methodology.** *Health Technol Assess* 2005*,* **9:**1-93, iii-iv. doi: 97-17-16 [pii]

Smith SC, Murray J, Banerjee S, Foley B, Cook JC, Lamping DL, et al:**What constitutes health-related quality of life in dementia? Development of a conceptual framework for people with dementia and their carers.** *Int J Geriatr Psychiatry* 2005*,* **20:**889-895. doi: 10.1002/gps.1374

Sousa KH: **Description of a health-related quality of life conceptual model.** *Outcomes Manag Nurs Pract* 1999*,* **3:**78-82.

Sousa KH, Chen FF: **Latent mean structure analysis: a technique to compare group differences in a second-order quality of life model.** *J Nurs Meas* 2003*,* **11:**253-266.

Sousa KH, Kwok OM: **Putting Wilson and Cleary to the test: analysis of a HRQOL conceptual model using structural equation modeling.** *Qual Life Res* 2006*,* **15**:725-737. doi: 10.1007/s11136-005-3975-4

Spiegel BM, Melmed G, Robbins S, Esrailian E: **Biomarkers and health-related quality of life in end-stage renal disease: a systematic review.** *Clin J Am Soc Nephrol* 2008*,* **3:**1759-1768. doi: CJN.00820208 [pii]10.2215/CJN.00820208

Sprangers MA, Schwartz CE: **Integrating response shift into health-related quality of life research: a theoretical model.** *Soc Sci Med* 1999*,* **48:**1507-1515. doi:S0277953699000453 [pii]

Stewart AL, Teno J, Patrick DL, Lynn J: **The concept of quality of life of dying persons in the context of health care.** *J Pain Symptom Manage* 1999*,* **17:**93-108. doi: S0885392498001316 [pii]

Swigris JJ, Stewart AL, Gould MK, Wilson SR: **Patients' perspectives on how idiopathic pulmonary fibrosis affects the quality of their lives**. *Health Qual Life Outcomes* 2005*,* **3:**61. doi: 1477-7525-3-61 [pii]10.1186/1477-7525-3-61

Tang WR, Aaronson LS, Forbes SA: **Quality of life in hospice patients with terminal illness.** *West J Nurs Res* 2004*,* **26:**113-128. doi: 10.1177/0193945903259207

Townshend KH, Dorris L, McEwan MJ, Aylett SE, Brodie MJ, O'Regan M, et al: **Development and validation of a measure of the impact of epilepsy on a young person's quality of life: Glasgow epilepsy outcome scale for young persons (GEOS-YP).** *Epilepsy Behav* 2008*,* **12:**115-123. doi: S1525-5050(07)00314-9[pii]10.1016/j.yebeh.2007.09.008

Tully PJ, Baker RA, Turnbull DA, Winefield HR, Knight JL: **Negative emotions and quality of life six months after cardiac surgery: the dominant role of depression not anxiety symptoms.** *J Behav Med* 2009*,* **32:**510-522. doi: 10.1007/s10865-009-9225-4

Urbach DR, Harnish JL, Long G: **Short-term health-related quality of life after abdominal surgery: a conceptual framework.** *Surg Innov* 2005*,* **12:**243-247.

Urbanoski KA, Cairney J, Adlaf E, Rush B: **Substance abuse and quality of life among severely mentally ill consumers: a longitudinal modeling analysis.** *Soc Psychiatry Psychiatr Epidemiol* 2007*,* **42:**810-818. doi: 10.1007/s00127-007-0236-6

Valderas JM, Alonso J: **Patient reported outcome measures: a model-based classification system for research and clinical practice.** *Qual Life Res* 2008*,* **17:**1125-1135. doi: 10.1007/s11136-008-9396-4

Vidrine DJ, Amick BC 3rd, Gritz ER, Arduino RC: Assessing a conceptual framework of health-related quality of life in a HIV/AIDS population. *Qual Life Res* 2005*,* **14:** 923-933.

Wallace M: **Uncertainty and quality of life of older men who undergo watchful waiting for prostate cancer.** *Oncol Nurs Forum* 2003*,* **30:**303-309. doi: 10.1188/03.ONF.291-300

Ward LS, Tanner AD: **Psychosocial stress and health-related quality of life for Latino migrant farmworkers.** *Southern Online Journal of Nursing Research* 2010*,* **10:**15.

Wettergren L, Bjorkholm M, Axdorph U, Langius-Eklof A: **Determinants of health-related quality of life in long-term survivors of Hodgkin's lymphoma.** *Qual Life Res* 2004*,* **13:**1369-1379.

White CL, Lauzon S, Yaffe MJ, Wood-Dauphinee S: **Toward a model of quality of life for family caregivers of stroke survivors.** *Qual Life Res* 2004*,* **13:**625-638.

Yeh CH, Hung LC: **Construct validity of newly developed quality of life assessment instrument for child and adolescent cancer patients in Taiwan.** *Psychooncology* 2003,**12:**345-356. doi: 10.1002/pon.647
